# Supplementary material
Source: Research Square preprint supplement (doi:10.21203/rs.3.rs-10255679/v1)
Supplement: Supplementary file 1 [file 359e3be9aea8edce6de86b09.docx]

**Additional file 1**

*Item-level descriptive statistics for the 21 items of the Depression Anxiety Stress Scales-21 (DASS-21) (N = 422)*

| **Item** | **M** | **SD** | **Mdn** | **Min** | **Max** |
| --- | --- | --- | --- | --- | --- |
| 1. I found it hard to wind down (S) | 1.16 | 0.82 | 1.00 | 0 | 3 |
| 2. I was aware of dryness of my mouth (A) | 0.74 | 0.83 | 0.00 | 0 | 3 |
| 3. I could not seem to experience any positive feeling (D) | 0.83 | 0.91 | 0.00 | 0 | 3 |
| 4. I experienced breathing difficulty (A) | 0.78 | 0.90 | 0.00 | 0 | 3 |
| 5. I found it difficult to work up the initiative to do things (D) | 0.98 | 0.97 | 1.00 | 0 | 3 |
| 6. I tended to over-react to situations (S) | 0.86 | 0.90 | 1.00 | 0 | 3 |
| 7. I experienced trembling (A) | 0.88 | 0.94 | 1.00 | 0 | 3 |
| 8. I felt that I was using a lot of nervous energy (S) | 0.84 | 0.92 | 1.00 | 0 | 3 |
| 9. I was worried about situations of panic (A) | 1.03 | 0.89 | 1.00 | 0 | 3 |
| 10. I felt that I had nothing to look forward to (D) | 1.01 | 0.85 | 1.00 | 0 | 3 |
| 11. I found myself getting agitated (S) | 0.97 | 0.93 | 1.00 | 0 | 3 |
| 12. I found it difficult to relax (S) | 1.02 | 0.91 | 1.00 | 0 | 3 |
| 13. I felt down-hearted and blue (D) | 0.79 | 0.88 | 1.00 | 0 | 3 |
| 14. I was intolerant of anything that kept me from getting on (S) | 0.81 | 0.90 | 1.00 | 0 | 3 |
| 15. I felt I was close to panic (A) | 1.04 | 0.90 | 1.00 | 0 | 3 |
| 16. I was unable to become enthusiastic about anything (D) | 0.99 | 0.93 | 1.00 | 0 | 3 |
| 17. I felt I was not worth much as a person (D) | 0.91 | 0.95 | 1.00 | 0 | 3 |
| 18. I felt that I was rather touchy (S) | 0.85 | 0.89 | 1.00 | 0 | 3 |
| 19. I was aware of the action of my heart without exertion (A) | 0.82 | 0.90 | 1.00 | 0 | 3 |
| 20. I felt scared without any good reason (A) | 1.07 | 0.92 | 1.00 | 0 | 3 |
| 21. I felt that life was meaningless (D) | 0.91 | 0.88 | 1.00 | 0 | 3 |

***Note.*** *D = depression subscale item; A = anxiety subscale item; S = stress subscale item. Items rated 0 (did not apply to me at all) to 3 (applied to me very much, or most of the time). M = mean; SD = standard deviation; Mdn = median.*
